# Supplementary material
Source: PubMed Central journal article supplement (PMC546169)
Supplement: nar_33_1_430__1.pdf [file nar_33_1_430__1.pdf]

## Local base-pair step parameters

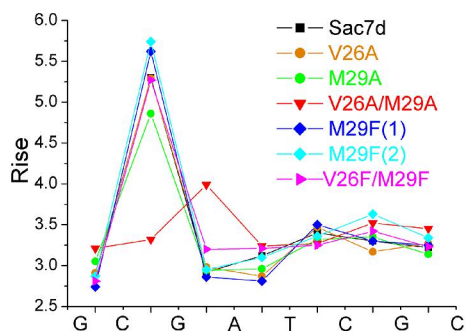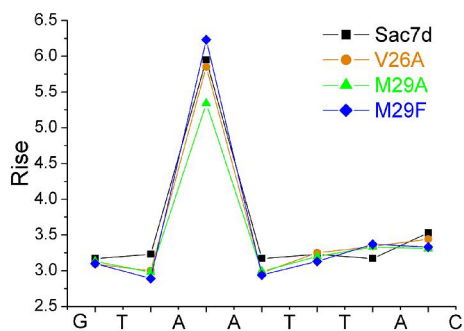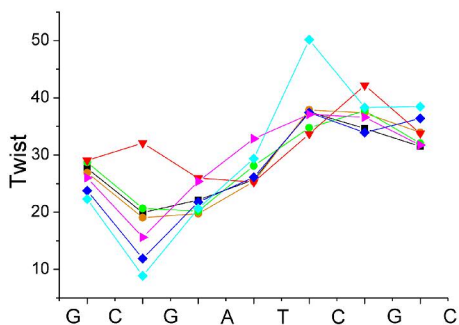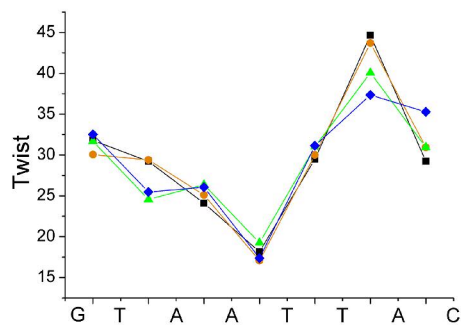

Rise and twist for all eight Sac7d mutant-DNA binary structures, calculated using the X3DNA program. Note the largest rise and the lowest twist angle at the kinked step (C2pG3, G3pA4 or A3pA4).
