# Supplementary material
Source: PubMed Central journal article supplement (PMC546169)
Supplement: nar_33_1_430__2.pdf [file nar_33_1_430__2.pdf]

## Sac7d mutants-DNA contacts

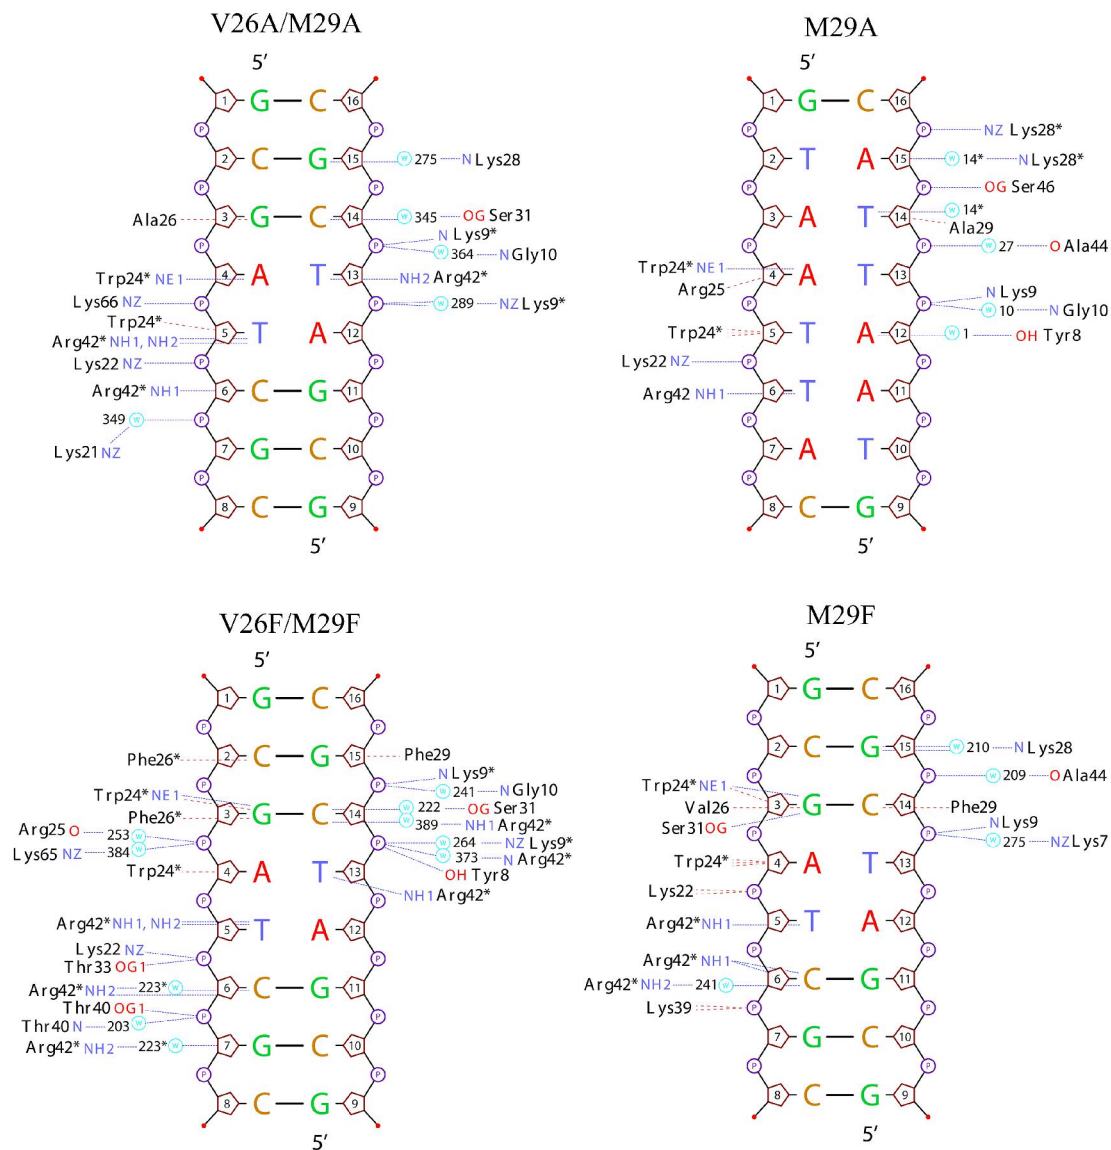

Schematic diagrams summarizing all the important protein-DNA contacts.

Blue dashed line: hydrogen bonds

Orange dashed line: van der Waals close contacts ( $< 3.35 \text{ \AA}$ )

\*: Residue/water on plot more than once.
