# Supplementary material
Source: PubMed Central journal article supplement (PMC546169)
Supplement: nar_33_1_430__3.pdf [file nar_33_1_430__3.pdf]

**Table 1S. Crystallization conditions of Sac7d mutant-DNA complexes**

|                      | <b>V26A<br/>GCGATCGC</b> | <b>V26A<br/>GTAATTAC</b> | <b>M29A<br/>GCGATCGC</b> | <b>M29A<br/>GTAATTAC</b> | <b>V26AM29A<br/>GCGATGCC</b> | <b>M29F<br/>GCGAU<sup>br</sup>CGC</b> | <b>M29F<br/>GTAATTAC</b> | <b>V26F/M29F<br/>GCGATCGC</b> |
|----------------------|--------------------------|--------------------------|--------------------------|--------------------------|------------------------------|---------------------------------------|--------------------------|-------------------------------|
| <b>Protein conc.</b> | 0.7 mM                   | 0.8 mM                   | 0.9 mM                   | 0.8 mM                   | 0.8 mM                       | 0.8 mM                                | 0.8 mM                   | 0.8 mM                        |
| <b>DNA conc.</b>     | 2.5 mM                   | 2.5mM                    | 2.5 mM                   | 2.5 mM                   | 3.3 mM                       | 2.5 mM                                | 2.5 mM                   | 2.5 mM                        |
| <b>Buffer</b>        | 5 mM Tris-Cl<br>pH 7.0       | 5 mM Tris-Cl<br>pH 7.0                | 5 mM Tris-Cl<br>pH 7.0   | 5 mM Tris-Cl<br>pH 7.0        |
| <b>Precipitator</b>  | 7.5% PEG400              | 6% PEG400                | 6.5% PEG400              | 7.5% PEG400              | 5% PEG400                    | 10% PEG400                            | 8% PEG400                | 4% PEG400                     |
| <b>Reservoir</b>     | 20% PEG400               | 15% PEG400               | 30% PEG400               | 30% PEG400               | 20% PEG400                   | 20% PEG400                            | 25% PEG400               | 15% PEG400                    |
