# Supplementary material
Source: PubMed Central journal article supplement (PMC546169)
Supplement: nar_33_1_430__4.pdf [file nar_33_1_430__4.pdf]

**Table 2S. The  $T_m$  of DNA in complex with protein.**

|                         | $T_m$ of the DNA ( $^{\circ}\text{C}$ ) |
|-------------------------|-----------------------------------------|
| (GCGATCGC) <sub>2</sub> | 34.2                                    |
| Wt-Sac7d-DNA            | 64.2                                    |
| M29F-DNA                | 48.6                                    |
| V26F/M29F-DNA           | 58.5                                    |

Thermal denaturation of DNA (GCGATCGC)<sub>2</sub> (80  $\mu\text{M}$  bases) alone and saturated with 400  $\mu\text{M}$  protein monitored by the change in UV absorbance at 260 nm in pH 7.4, 20mM Tris-Cl buffer. In the presence of protein, the DNA melting temperature was increased  $\sim 30$   $^{\circ}\text{C}$  above that of DNA alone.
