# Supplementary material
Source: PubMed Central journal article supplement (PMC546169)
Supplement: nar_33_1_430__5.pdf [file nar_33_1_430__5.pdf]

**Table 3S. Association constant of different Sac7d Proteins with poly (dA · dT)**

|           | Association constant Ka (M) |
|-----------|-----------------------------|
| Sac7d     | $4 \times 10^6$             |
| V26A      | $0.7 \times 10^6$           |
| M29A      | $0.8 \times 10^6$           |
| V26A/M29A | $0.4 \times 10^6$           |

The association constant (Ka) at 25 °C for protein bound to poly [dAdT] · poly [dAdT] DNA.
